# Supplementary material
Source: PubMed Central journal article supplement (PMC2383930)
Supplement: 0712130105_Supplemental_PDF.pdf [file 0712130105_Supplemental_PDF.pdf]

# Supporting Information

Coffey et al. 10.1073/pnas.0712130105

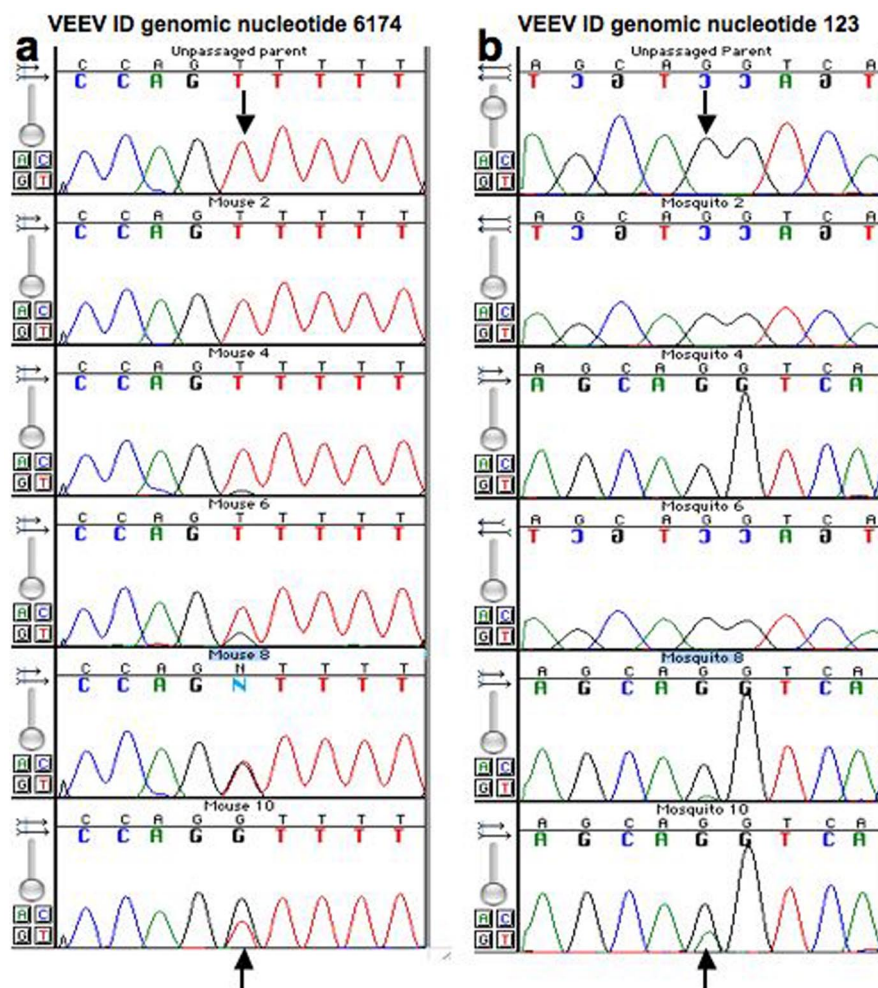

**Fig. S1.** Sequencing chromatograms for VEEV 8131 isolated from sera of every second mouse in the serial vertebrate passage series (a) or every second mosquito pool in the serial invertebrate passage series (b). Arrows indicate the development of mixed nucleotide populations; by the 10th mouse passage, the mutant guanine was dominant over the parental thymine (a), and the mutant nucleotide (adenine) was increasing in intensity with serial mosquito passage (b). Labels above each chromatogram correspond to the mouse/mosquito pool number.

Table S1. Genetic differences between parent, serial, and alternately *in vivo*-passaged VEE ID and IC viruses

| VEEV subtype | Passage Series                                                                    | Nucleotide differences vs. parent | Genome position              | Gene                         | Amino acid change Parent->Progeny |
|--------------|-----------------------------------------------------------------------------------|-----------------------------------|------------------------------|------------------------------|-----------------------------------|
| enzootic ID  |  | 4                                 | 2889<br>3807<br>3918<br>6726 | nsP2<br>nsP2<br>nsP3<br>nsP4 | no<br>no<br>no<br>no              |
|              |  | 0<br>(1 mixture)                  | 123<br>(mixture)             | nsP1                         | no                                |
|              |  | 1                                 | 6174                         | nsP4                         | Arg » Ser                         |
| epizootic IC |  | 3                                 | 2468<br>7175<br>8854         | nsP2<br>nsP4<br>E2           | no<br>no<br>no                    |
|              |  | 0                                 | n.a.                         | n.a.                         | n.a.                              |
|              |  | 1                                 | 6541                         | nsP4                         | Met » Leu                         |

n.a., not applicable.
